# Supplementary material for: Agonist activation of estrogen receptor beta (ERβ) sensitizes malignant pleural mesothelioma cells to cisplatin cytotoxicity
Source: PubMed Central journal article supplement (PMC4197308; doi:10.1186/1476-4598-13-227), 2014-10-02
Supplement: 12943_2014_1428_MOESM1_ESM.pdf [file 12943_2014_1428_MOESM1_ESM.pdf]

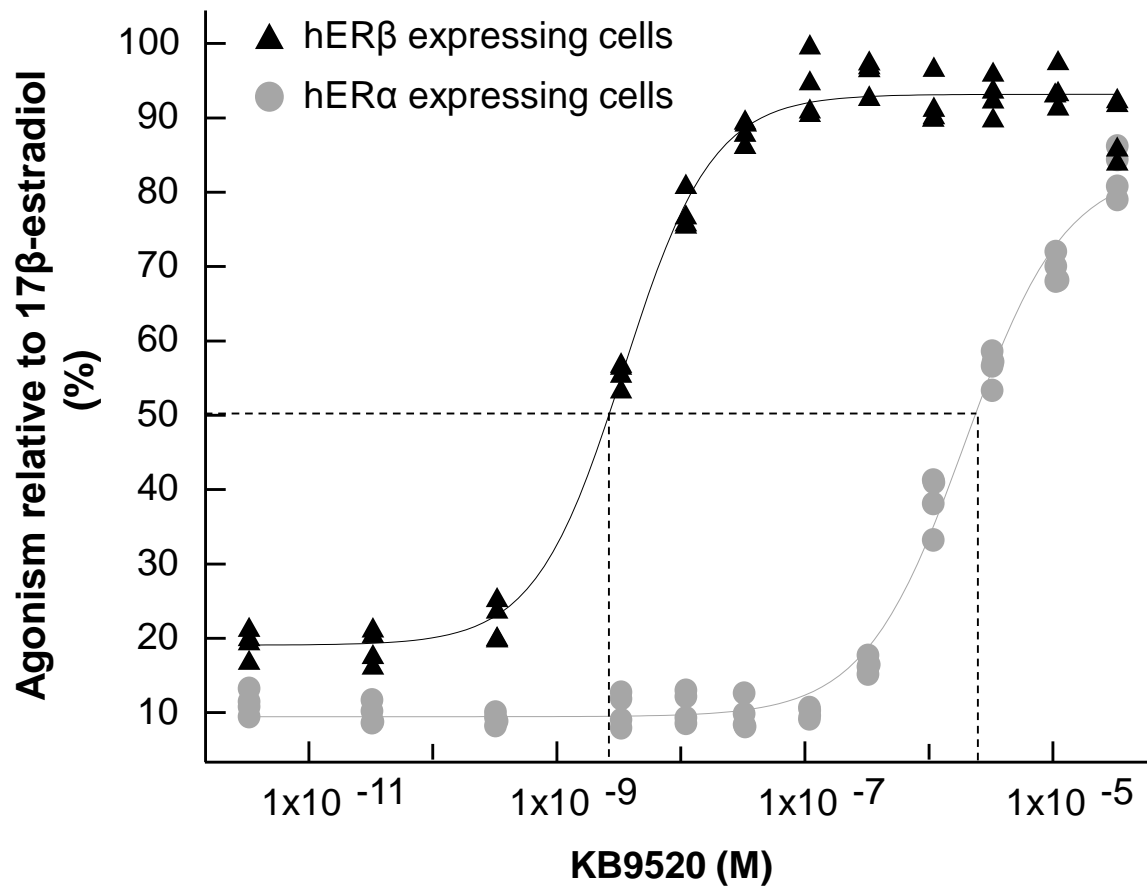

**Figure S1.** Concentration-dependent induction of reporter gene expression in 293 cells genetically engineered to express the human estrogen receptor alpha (hER $\alpha$ ) and human estrogen receptor beta 1 (hER $\beta$ ) [58].
